# Supplementary material for: Neuroprotective Effect of Cyperi rhizome against Corticosterone-Induced PC12 Cell Injury via Suppression of Ca2+ Overloading
Source: Metabolites. 2019 Oct 23;9(11):244. doi: 10.3390/metabo9110244 (PMC6918173; doi:10.3390/metabo9110244)
Supplement: Supplementary file 1 [file metabolites-09-00244-s001.pdf]

## Electronic Supplementary Information

### Neuroprotective effect of *Cyperi rhizome* against corticosterone-induced PC12 cells via suppress $Ca^{2+}$ overloading

Hongmei Jia, Yang Liu, Meng Yu, Hai Shang, Hongwu Zhang, Liyan Ma, Tao Zhang, Zhongmei Zou\*

*Institute of Medicinal Plant Development, Chinese Academy of Medical Sciences and Peking Union Medical College, No. 151 Malianwa North Road, Haidian District, Beijing 100193, China*

Tab S1 Summary of metabolic pathway analysis with MetaboAnalyst 3.0.based on the identified metabolites

| Metabolic pathway              | Total | Expected | Hits | Raw p     | Impact  |
|--------------------------------|-------|----------|------|-----------|---------|
| Sphingolipid metabolism        | 21    | 0.074893 | 2    | 0.0020808 | 0.14286 |
| Glycerophospholipid metabolism | 30    | 0.10699  | 1    | 0.10265   | 0.04444 |
| Steroidhormone biosynthesis    | 70    | 0.24964  | 1    | 0.22622   | 0.01699 |

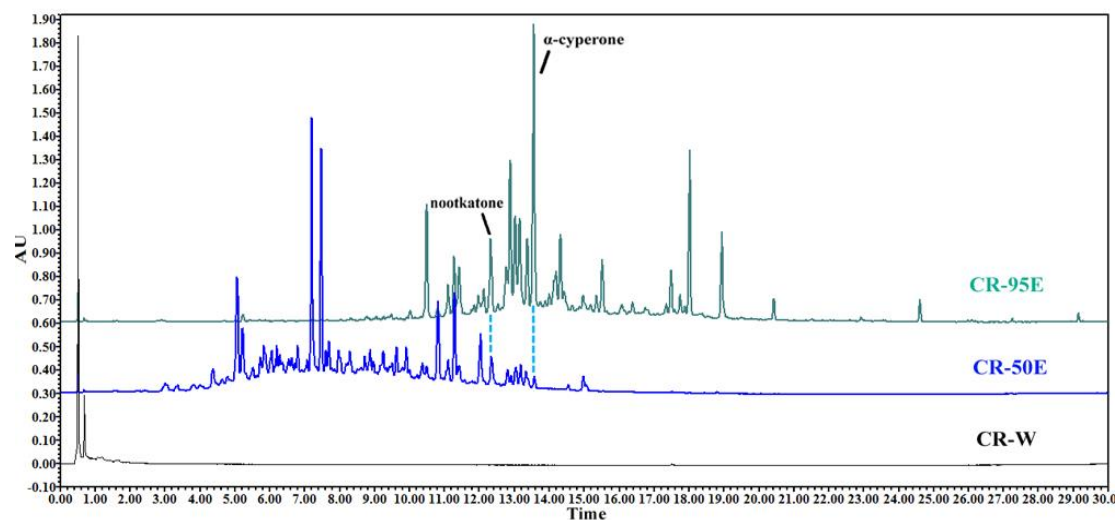

**Fig. S1** UPLC chromatograms of the *CR-95E*, *CR-50E* and *CR-W* extracts.

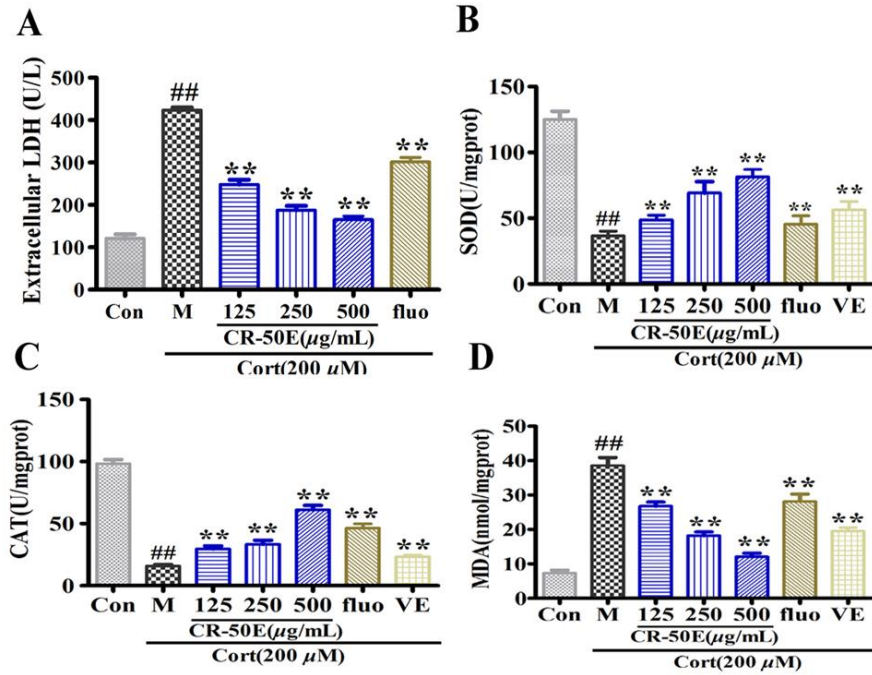

**Fig S2.** Effect of *CR-50E* on corticosterone-induced antioxidants enzymes (SOD, CAT, and MDA) activity; Cells were exposed to 200  $\mu$ M of corticosterone in the absence or presence of *CR-50E* for 24h. Results are presented as means  $\pm$  SD (n=6). <sup>\*\*</sup> $p$  < 0.01, compared with corticosterone-treated group (Cort), <sup>#</sup> $p$  < 0.05 or <sup>##</sup> $p$  < 0.01, compared with control group.

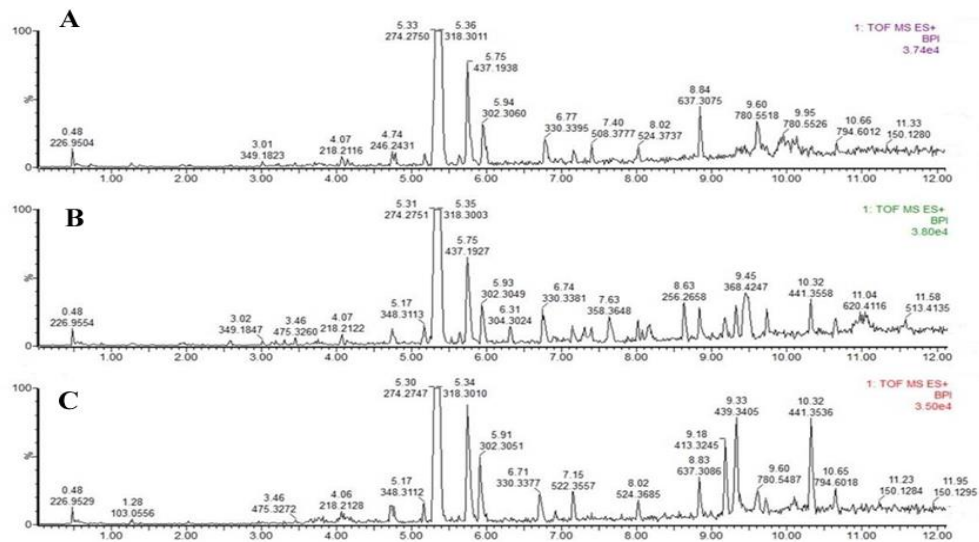

**Fig. S3** Base peak intensity (BPI) chromatograms of UPLC-Q-TOF/MS in positive ion mode from the PC12 cell samples in each group. A: control group; B: corticosterone-treated group; C: High dose CR-50E-treated group.

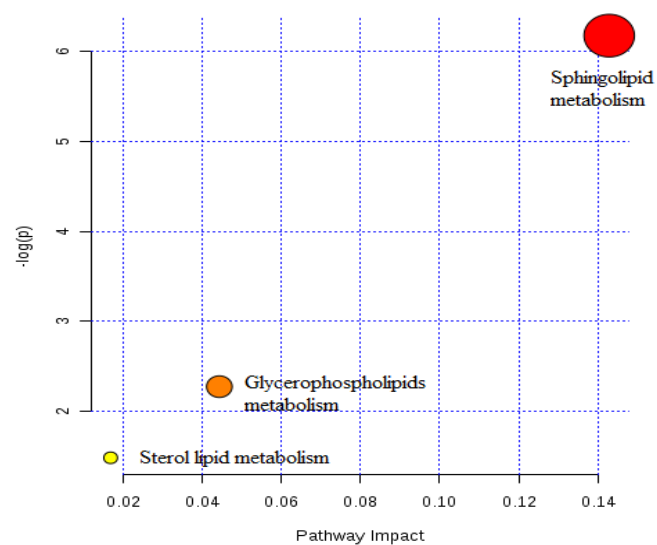

**Fig. S4** Summary of metabolic pathway analysis with MetaboAnalyst 3.0. Each point represents one metabolic pathway; the size of dot and shades of color is in positive correlation with the impact of the metabolic pathway.
